# Supplementary material
Source: PubMed Central journal article supplement (PMC1876500)
Supplement: ppat.0030064.st001.pdf [file ppat.0030064.st001.pdf]

**Amplification Primers**

| Name   | Sequence               | Size   |
|--------|------------------------|--------|
| AG0027 | GCCAGCATTAAGCACAGGA    | 3043bp |
| AG0029 | GCTTGAGACACAAATTCTTCCA |        |

|        |                        |        |
|--------|------------------------|--------|
| AG0033 | TCCTGTGCTTAATGCTGGC    | 2229bp |
| AG0034 | TGGAAGAATTTGTGTCTCAAGC |        |

|        |                      |        |
|--------|----------------------|--------|
| AG0052 | TTATGTGCAGGAATGTGCAG | 2552bp |
| AG0053 | CTCTACTGTGGGAGGCAAGG |        |

|        |                      |        |
|--------|----------------------|--------|
| AG0054 | CTGCACATTCCTGCACATAA | 2679bp |
| AG0055 | CCTTGCCCTCCACAGTAGAG |        |

|        |                      |        |
|--------|----------------------|--------|
| AG0056 | TAGCAGCCACAAGGTGGAGC | 2576bp |
| AG0057 | AAGGGCCCTGTTTCTTCAGT |        |

|        |                      |        |
|--------|----------------------|--------|
| AG0058 | GCTCCACCTTGTGGCTGCTA | 2655bp |
| AG0059 | ACTGAAGAAACAGGGCCCTT |        |

**Sequencing Primers**

| Name   | Sequence              |
|--------|-----------------------|
| M13F   | GTAAAACGACGGCCAG      |
| M13R   | CAGGAAACAGCTATGAC     |
| AG0035 | TGCATTCTACCTGTGAAGAGC |
| AG0036 | GCATTTACTGGGTCAGATTCC |

|        |                      |
|--------|----------------------|
| M13F   | GTAAAACGACGGCCAG     |
| M13R   | CAGGAAACAGCTATGAC    |
| AG0037 | TGCATGTCAGCAAATTCAGT |

|        |                      |
|--------|----------------------|
| M13F   | GTAAAACGACGGCCAG     |
| M13R   | CAGGAAACAGCTATGAC    |
| AG0066 | CAGGATACAATCCCCAAGGA |
| AG0067 | ACCTTCCTGGTTTTGCTGTG |

|        |                      |
|--------|----------------------|
| M13F   | GTAAAACGACGGCCAG     |
| M13R   | CAGGAAACAGCTATGAC    |
| AG0064 | ACCAGGCTACACCAGCCATA |
| AG0065 | ATGCAAGGGGTTGGCTTAAC |

|        |                       |
|--------|-----------------------|
| M13F   | GTAAAACGACGGCCAG      |
| M13R   | CAGGAAACAGCTATGAC     |
| AG0060 | ATGGGCATATTGCTTGCTGT  |
| AG0061 | TTCATTGCATCCCACCTGCC  |
| AG0062 | ATGCAGCCCCTGACTGGATT  |
| AG0063 | GCTGGCATACTTTACTACAGG |

|        |                      |
|--------|----------------------|
| M13F   | GTAAAACGACGGCCAG     |
| M13R   | CAGGAAACAGCTATGAC    |
| AG0070 | TGTTACAATACCTGGAGGAA |
| AG0071 | CCACATCAATAGCCTGTTGA |
| AG0072 | GCTAATAGTACAGTATCCCT |
| AG0073 | CAAAGCCAAACCACTCTCTA |
